# Supplementary material
Source: Springer Nature journal article supplement (https://www.springermedizin.de/resource/supplementary/11689_2013_72_MOESM4_ESM.pdf/9673180)

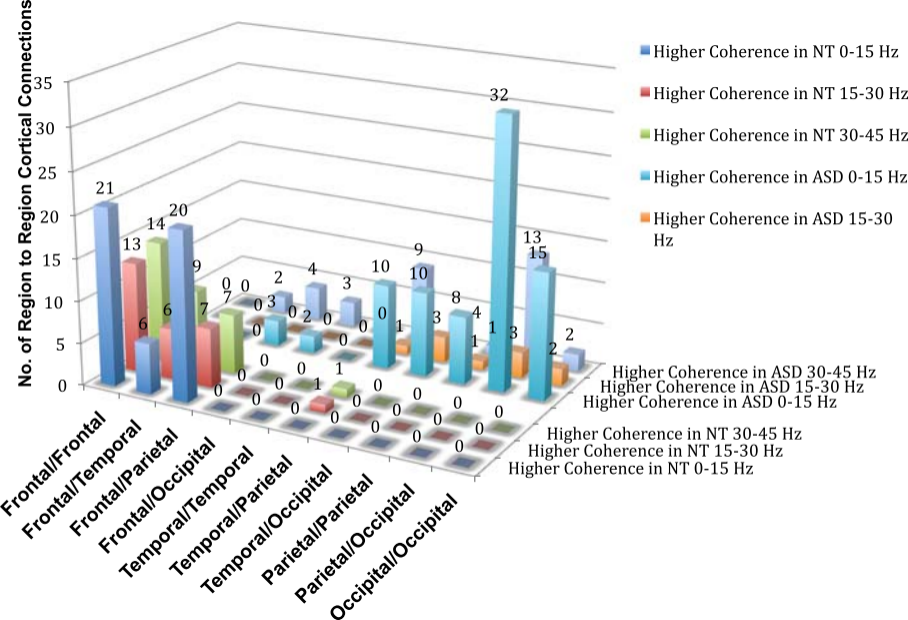

Supplement: MOESM4 [file 9673180]
